# Supplementary material for: Acid- and alkaline-induced phase and structure reconstruction of nickel sulfide toward enhanced electrochemical performance
Source: Royal Society of Chemistry journal article supplement (doi:10.1039/d4ce00631c), 2024-01-01
Supplement: d4ce00631c1.pdf [file d4ce00631c1.pdf]

## Supplementary Material

### Acid- and Alkaline-induced Phase and Structure Reconstruction of Nickel Sulfide toward Enhanced Electrochemical Performance

Qin Hu <sup>a</sup>, Youcun Bai <sup>b</sup>, Yuanlai Fang <sup>c</sup>, Lei Guo <sup>d\*</sup>, Wenpo Li <sup>e\*</sup>

<sup>a</sup> School of Mechanical Engineering, Chengdu University, Chengdu 610106, P. R. China

<sup>b</sup> Institute for Materials Science and Devices, School of Materials Science & Engineering, Suzhou University of Science & Technology, Suzhou 215011, P. R. China

<sup>c</sup> Institute for Advanced Study, Chengdu University Chengdu 610106, P. R. China

<sup>d</sup> School of Material and Chemical Engineering, Tongren University, Tongren 554300, P. R. China

<sup>e</sup> Chemistry and Chemical Engineering, Chongqing University, Chongqing 400044, P. R. China

\* Corresponding author, E-mail: liwenpo@aliyun.com, chygl@gztrc.edu.cn

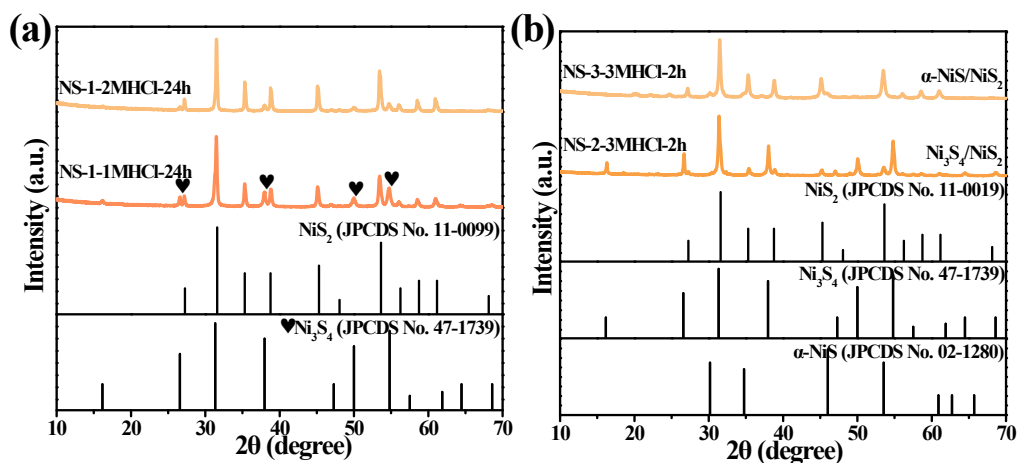

Fig. S1 (a) XRD patterns of NS-1-1MHCl-24h and NS-1-2MHCl-24h, and (b) NS-2-3MHCl-2h

and NS-3-3MHCl-2h

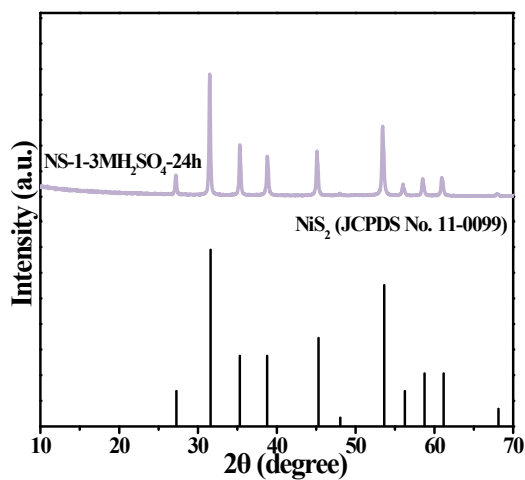

Fig. S2 XRD pattern of NS-1-3MH<sub>2</sub>SO<sub>4</sub>-24h

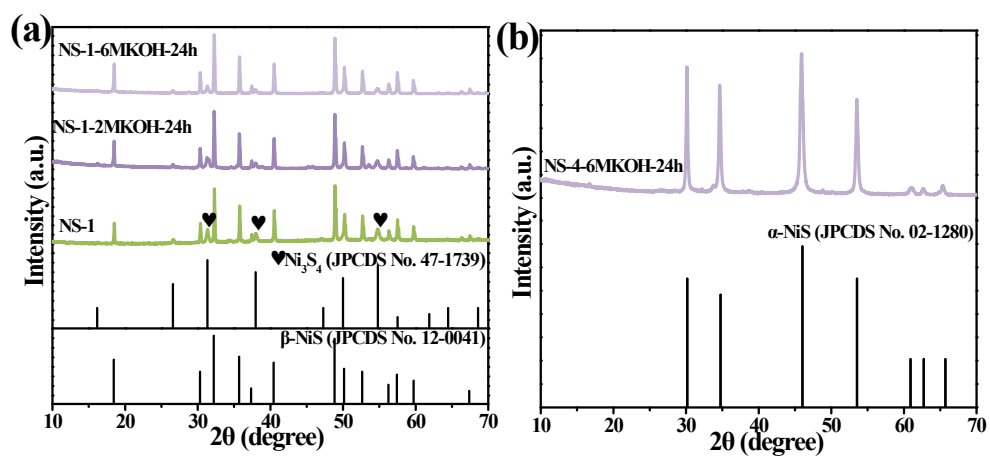

Fig. S3 (a) XRD patterns of NS-1, NS-1-2MKOH-24h, and NS-1-6MKOH-24h; (b) XRD pattern of NS-4-6MKOH-24h

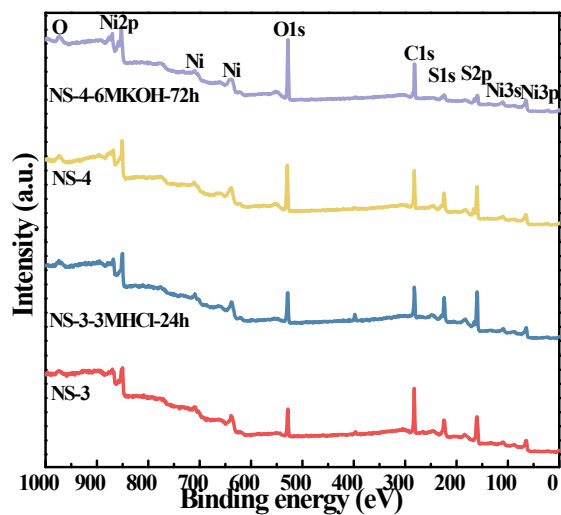

Fig. S4 XPS survey of NS-3, NS-3-3MHCl-24h, NS-4, and NS-4-6MKOH-72h

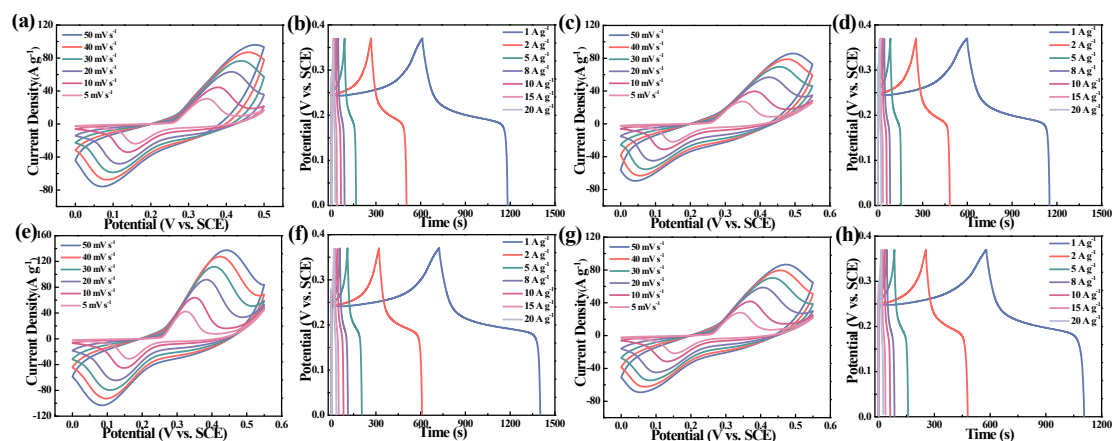

Fig. S5 (a) CV curves and (b) GCD curves of NS-1, (c) CV curves and (d) GCD curves of NS-2,

(e) CV curves and (f) GCD curves of NS-3, (g) CV curves and (h) GCD curves of NS-4

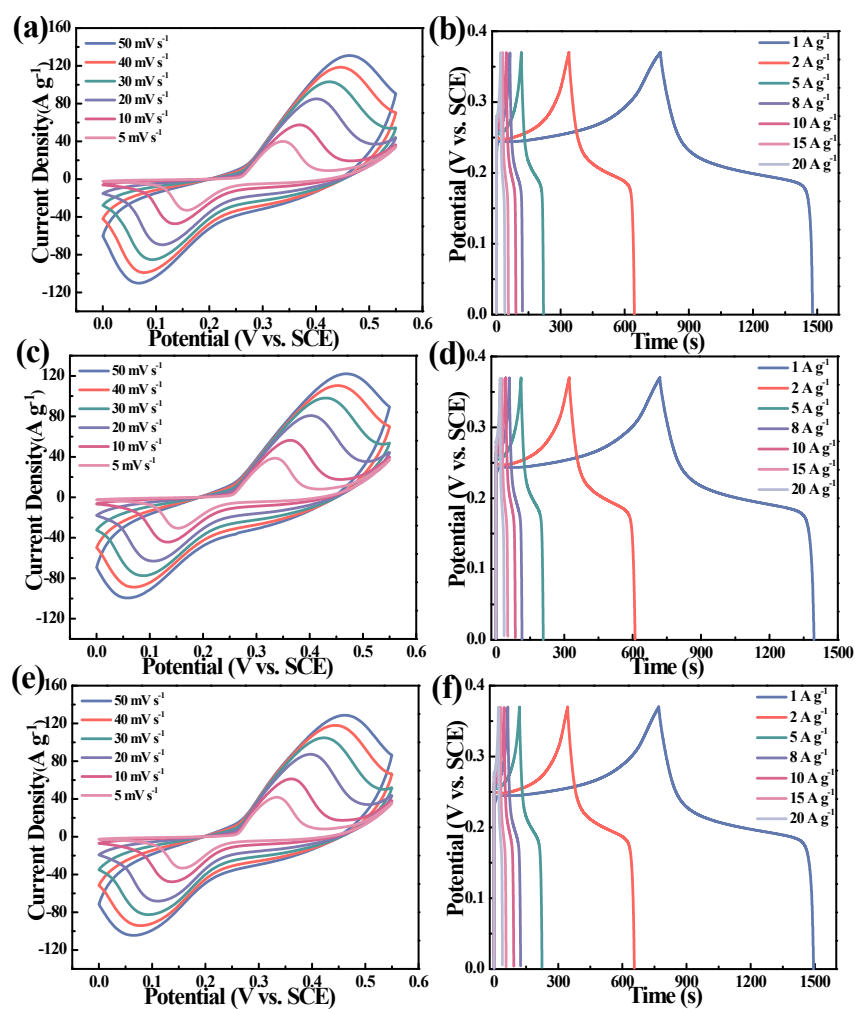

Fig. S6 (a) CV curves and (b) GCD curves of NS-1-3MHCl-24h, (c) CV curves and (d) GCD curves

of NS-2-3MHCl-24h, (e) CV curves and (f) GCD curves of NS-3-3MHCl-24h

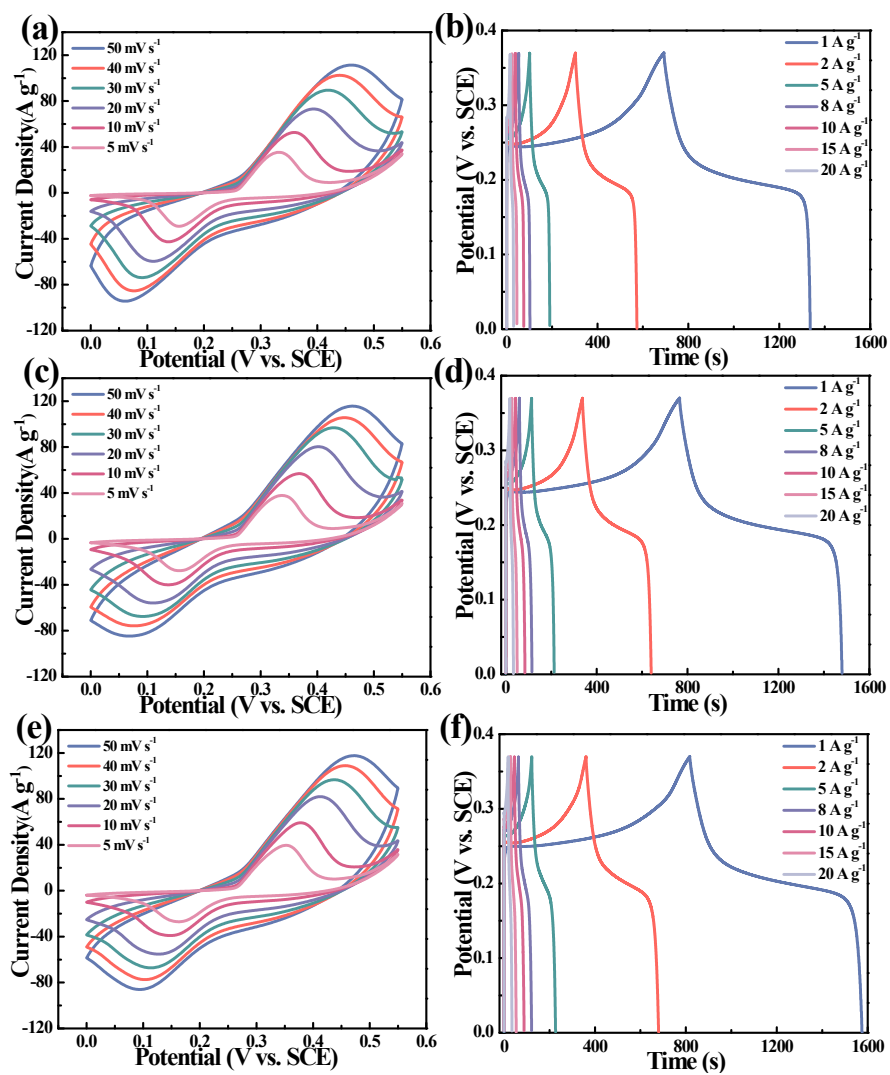

**Fig. S7** (a) CV curves and (b) GCD curves of NS-1-6MKOH-72h, (c) CV curves and (d) GCD curves of NS-2-6MKOH-72h, (e) CV curves and (f) GCD curves of NS-4-6MKOH-72h

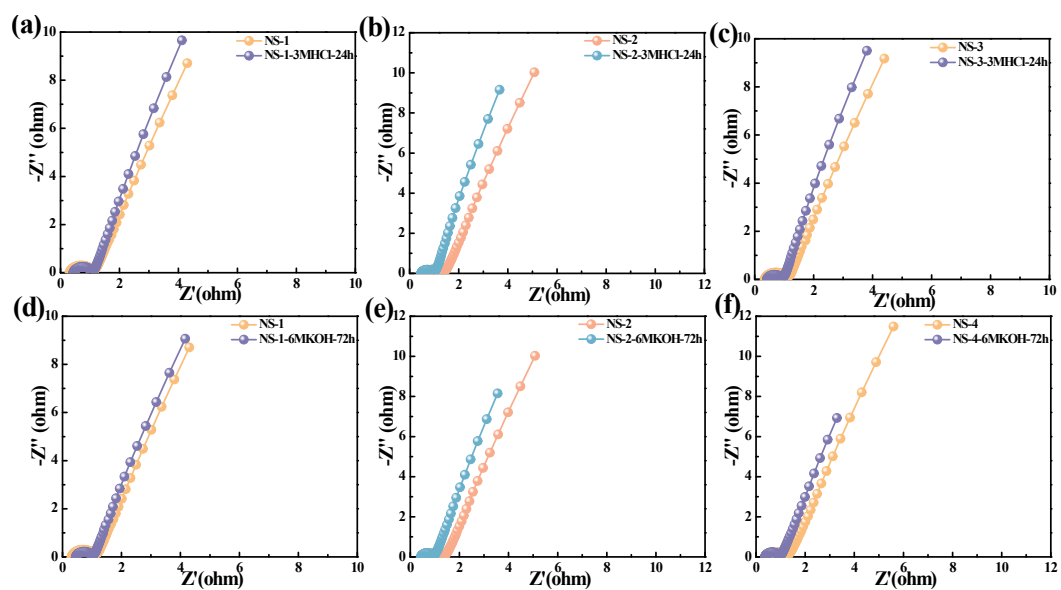

**Fig. S8** EIS plots of (a) NS-1 and NS-1-3MHCl-24h, (b) NS-2 and NS-2-3MHCl-24h, (c) NS-3 and NS-3-3MHCl-24h, (d) NS-1 and NS-1-6MKOH-72h, (e) NS-2 and NS-2-6MKOH-72h, and (f) NS-4 and NS-4-6MKOH-72h
